# Supplementary material for: Design, characterization and evaluation of β-hairpin peptide hydrogels as a support for osteoblast cell growth and bovine lactoferrin delivery
Source: Royal Society of Chemistry journal article supplement (doi:10.1039/d0ra03011b), 2020-01-01
Supplement: d0ra03011b1.pdf [file d0ra03011b1.pdf]

## Supplementary Information

### Design, characterization and evaluation of $\beta$ -hairpin peptide hydrogels as support for osteoblast cell growth and bovine lactoferrin delivery

Luis M. De Leon-Rodriguez,<sup>a†</sup> Young-Eun Park,<sup>b†</sup> David S. Musson,<sup>b</sup> Jillian Cornish,<sup>\* b</sup> and Margaret A. Brimble<sup>\*a,c</sup>

<sup>a</sup> School of Chemical Sciences, The University of Auckland, 23 Symonds Street, Auckland 1010, New Zealand. E-mail: m.brimble@auckland.ac.nz

<sup>b</sup> Department of Medicine, University of Auckland, Auckland 1020, New Zealand. E-mail: j.cornish@auckland.ac.nz

<sup>c</sup> Maurice Wilkins Centre for Molecular Biodiscovery, The University of Auckland, 3A Symonds Street, Auckland 1010, New Zealand.

<sup>†</sup> These first authors contributed equally.

#### Table of Contents

**Figure S1.** LCMS profile of purified peptide H4LMAX.

**Figure S2.** LCMS profile of purified peptide H4LMAX-RGDS.

**Figure S3.** LCMS profile of purified peptide H2LRDMAX.

**Figure S4.** Loss modulus ( $G''$ ) of 1 wt % peptide hydrogels.

**Figure S5.** Frequency sweep (0.2 % strain) of 1 wt % hydrogel of H4LMAX-RGDS and H2LRDMAX.

**Figure S6.** Strain sweep ( $6 \text{ rad.s}^{-1}$ ) of 1 wt % hydrogel of H4LMAX-RGDS and H2LRDMAX.

**Figure S7.** ATR-FTIR spectra of a hydrogels.

**Figure S8.** Storage ( $G'$ ) and loss modulus ( $G''$ ) of 1 wt % H4LMAX-RGDS hydrogel containing LF.

**Figure S9.** Cumulative LF release profiles from 1 wt % H4LMAX and H4LRDMAX.

**Figure S10.** Transmission electron micrographs of a 50-fold water diluted sample 1 wt % H4LMAX-RGDS containing LF.

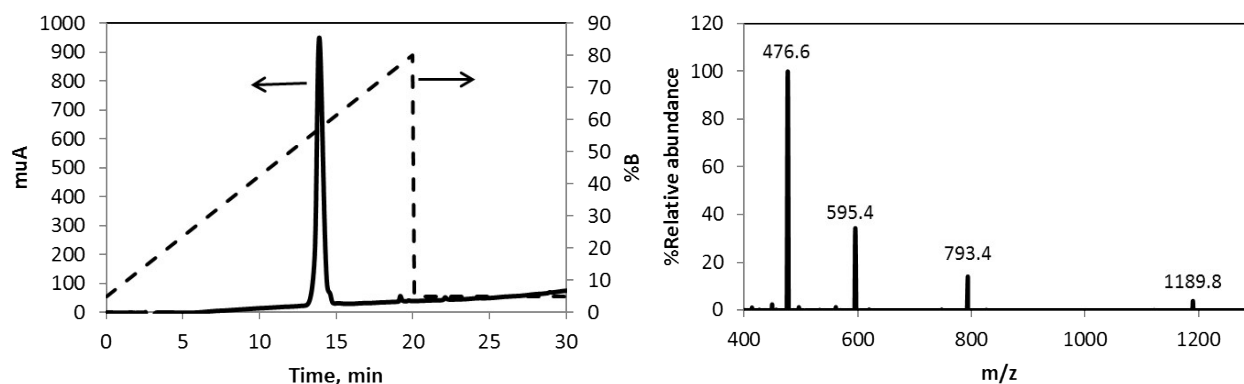

**Figure S1.** LCMS profile of purified peptide H4LMAX ( $t_R$  = 13.9 min, ca 98 % as analysed by peak area of RP-HPLC at 214 nm). ESI-MS spectrum of H4LMAX, mass spectra depict m/z ions found at the signal. Peak assignment:  $[M + 2H]^{2+}$  obs. 1189.8 (calc. 1190.0);  $[M + 3H]^{3+}$  obs. 793.4 (calc. 793.7);  $[M + 4H]^{4+}$  obs. 595.4 (calc. 595.5);  $[M + 5H]^{5+}$  obs. 476.6 (calc. 476.6).

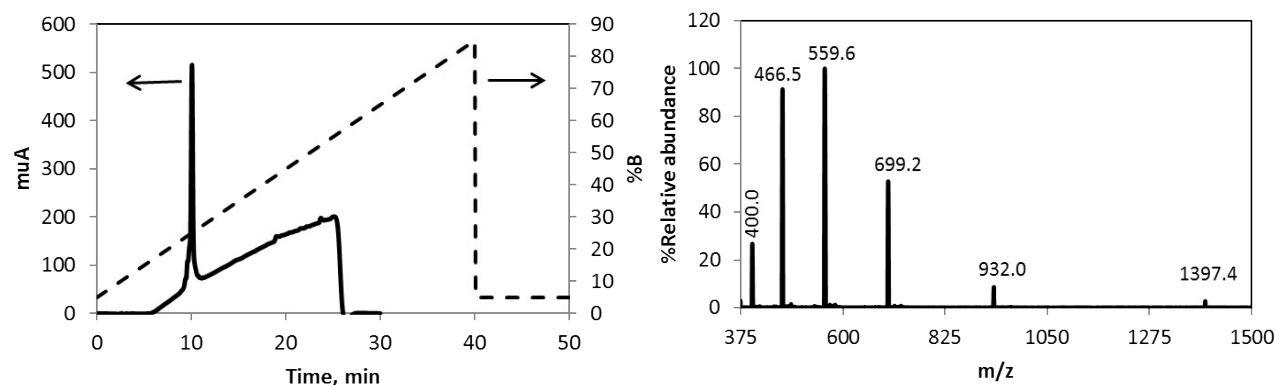

**Figure S2.** LCMS profile of purified peptide H4LMAX-RGDS ( $t_R$  = 10.1 min, ca 99% as analysed by peak area of RP-HPLC at 214 nm). ESI-MS spectrum of H4LMAX-RGDS, mass spectra depict m/z ions found at the signal. Peak assignment:  $[M + 2H]^{2+}$  obs. 1397.4 (calc. 1397.7);  $[M + 3H]^{3+}$  obs. 932.0 (calc. 932.2);  $[M + 4H]^{4+}$  obs. 699.2 (calc. 699.4);  $[M + 5H]^{5+}$  obs. 559.6 (calc. 559.7);  $[M + 6H]^{6+}$  obs. 466.5 (calc. 466.6);  $[M + 7H]^{7+}$  obs. 400.0 (calc. 400.1).

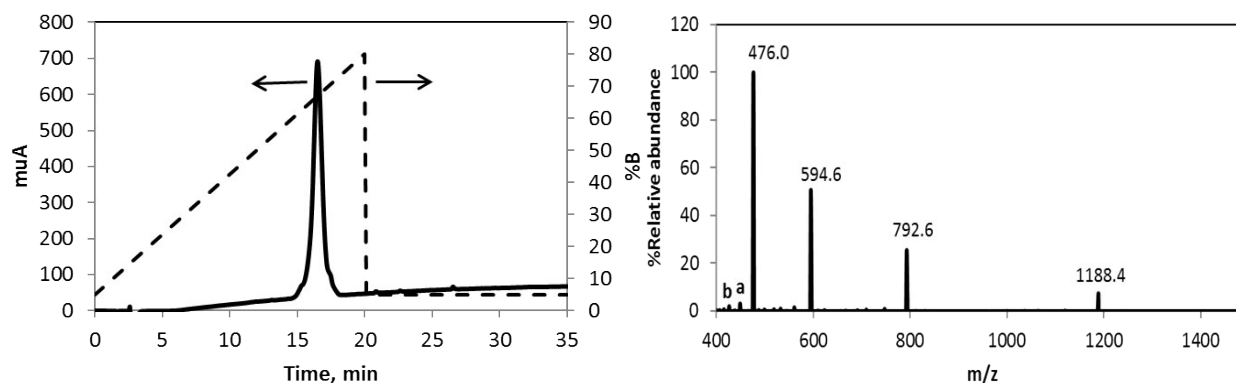

**Figure S3.** LCMS profile of purified peptide H2LRDMAX ( $t_R = 16.5$  min, ca 94 % as analysed by peak area of RP-HPLC at 214 nm). ESI-MS spectrum of H2LRDMAX, mass spectra depict  $m/z$  ions found at the signal. Peak assignment:  $[M + 2H]^{2+}$  obs. 1188.4 (calc. 1188.5);  $[M + 3H]^{3+}$  obs. 792.6 (calc. 792.7);  $[M + 4H]^{4+}$  obs. 595.5 (calc. 594.8);  $[M + 5H]^{5+}$  obs. 476.0 (calc. 476.0). The signal labeled as (a) corresponds to the His N-terminus truncated peptide  $[M + 5H]^{5+}$  obs. 448.5 (calc. 448.6). The signal labeled as (b) corresponds to the His-Leu N-terminally truncated peptide  $[M + 5H]^{5+}$  obs. 425.9 (calc. 425.9).

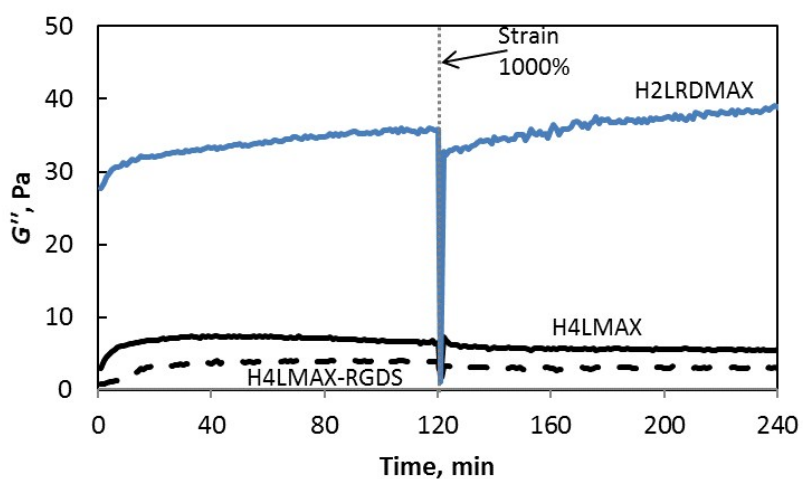

**Figure S4.** Loss modulus ( $G''$ ) of 1 wt % peptide hydrogels in 50 mM Tris buffer pH 7.4 with 30 mM NaCl at 37 °C as a function of time (6  $\text{rad.s}^{-1}$ , 0.2% strain).

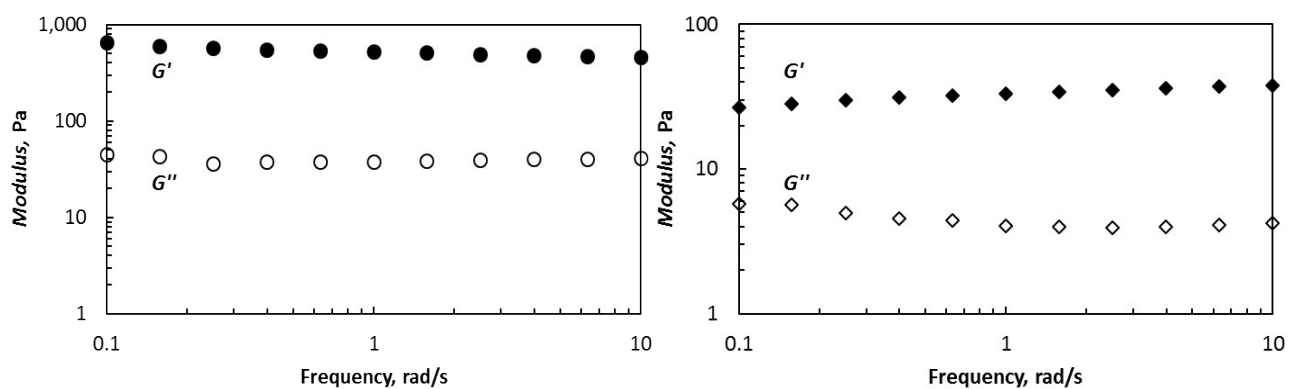

**Figure S5.** Frequency sweep (0.2 % strain) of 1 wt % hydrogel of H4LMAX-RGDS (left) and H2LRDMAX (right) in 50 mM Tris buffer pH 7.4 with 30 mM NaCl at 37 °C after first dynamic time sweep measurement in Fig S4.  $G'$  values are represented by filled symbols and  $G''$  by open symbols.

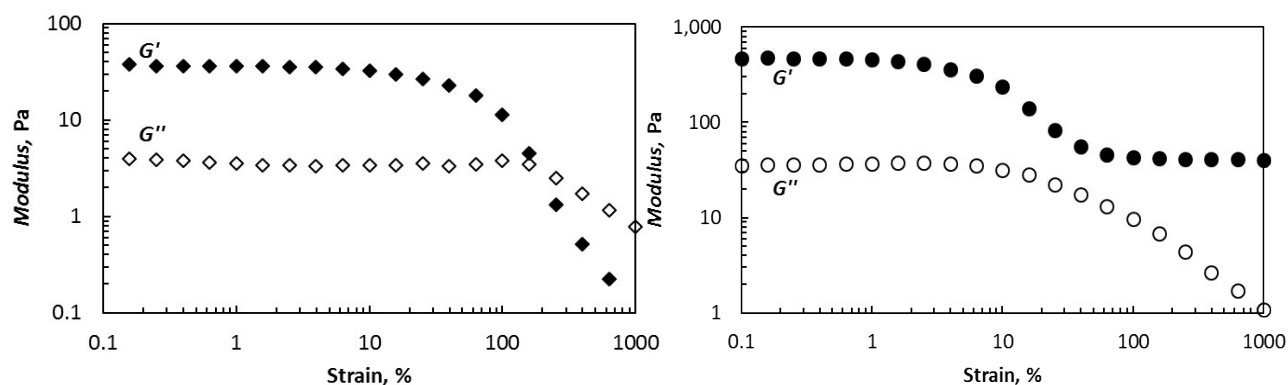

**Figure S6.** Strain sweep (6 rad.s<sup>-1</sup>) of 1 wt % hydrogel of H4LMAX-RGDS (left) and H2LRDMAX (right) in 50 mM Tris buffer pH 7.4 with 30 mM NaCl at 37 °C after first dynamic time sweep measurement in Fig S4.  $G'$  values are represented by filled symbols and  $G''$  by open symbols.

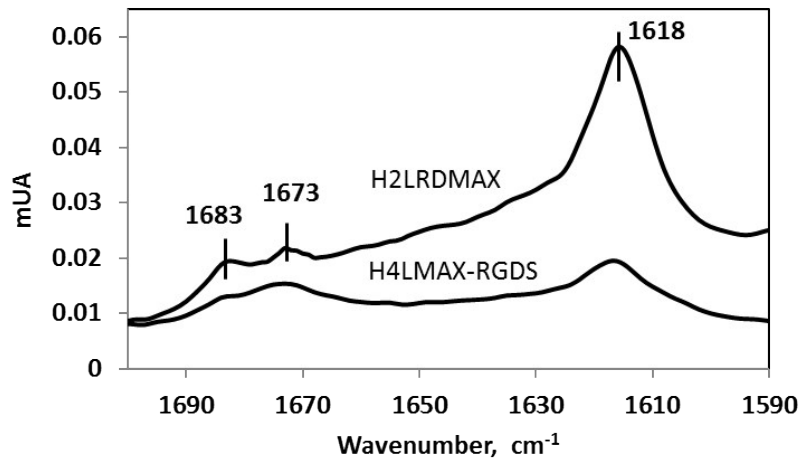

**Figure S7.** ATR-FTIR spectra of hydrogels at 1 wt % in D<sub>2</sub>O with 50 mM Tris buffer pH 7.4 with 30 mM NaCl.

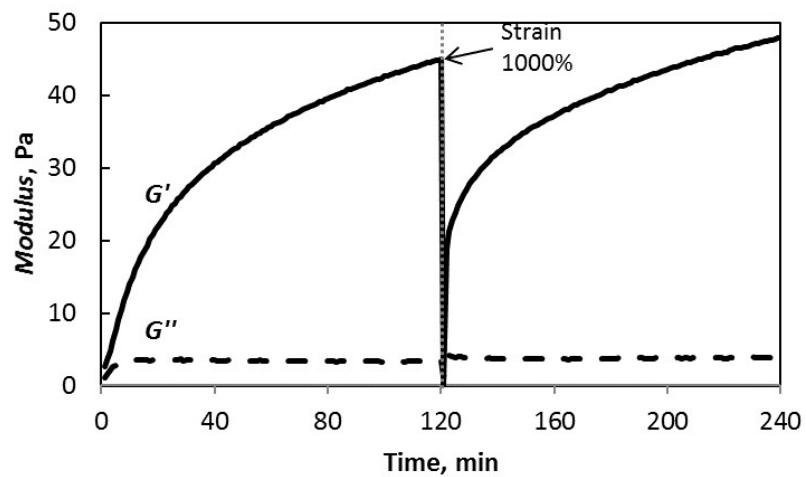

**Figure S8.** Storage ( $G'$ ) and loss modulus ( $G''$ ) of 1 wt % H4LMAX-RGDS hydrogel containing 80  $\mu$ g of LF in 50 mM Tris buffer pH 7.4 with 30 mM NaCl at 37 °C as a function of time (6 rad.s<sup>-1</sup>, 0.2% strain).

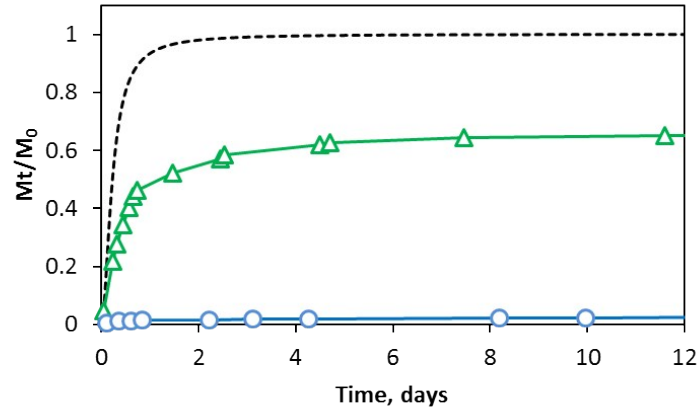

**Figure S9.** Cumulative LF release profiles from 1 wt % H4LMAX (blue open circles) and H4LRD MAX (green open triangles) hydrogels in 50 mM Tris buffer pH 7.4 with 150 mM NaCl at room temperature. The data points are connected with a solid line to guide the eye of the reader. Error bars are smaller than the symbol where not evident. The black dashed line represents a theoretical LF release scenario driven by the mass action law. Dissolution of the hydrogels was not observed during the experiments.

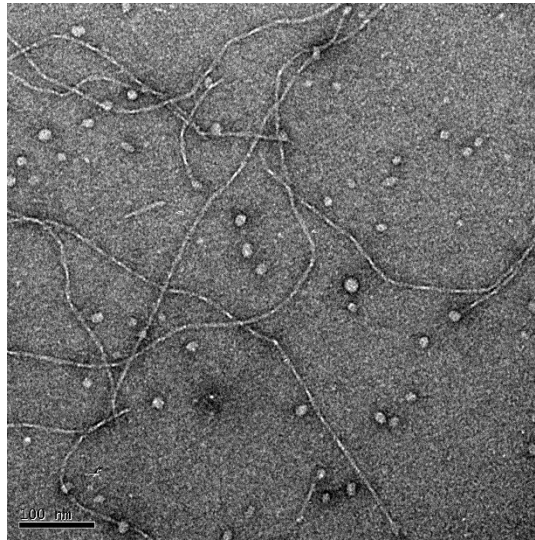

**Figure S10.** Transmission electron micrographs of a sample of H4LMAX-RGDS with LF 50-fold water diluted from a 1 wt % hydrogel in 50 mM Tris buffer pH 7.4 with 30 mM NaCl and 80  $\mu$ g of LF. The black scale bar corresponds to 100 nm.
